# Supplementary material for: Quality of Life Following Pelvic Organ Prolapse Treatments in Women: A Systematic Review and Meta-Analysis
Source: MDPI journal article supplement (doi:10.3390/jcm11237166), 2022-12-01
Supplement: s1 [file s1]

## Supplementary Material

### Quality of life following pelvic organ prolapse treatments in women: A systematic review and meta-analysis

#### Search query

#### PubMed Search Query:

1- "Pelvic Organ Prolapse"[mh] OR Pelvic Organ Prolapse[tiab] OR Pelvic Organ Prolapses[tiab] OR Urogenital Prolapse[tiab] OR Urogenital Prolapses[tiab] OR Vaginal Vault Prolapse[tiab] OR Vaginal Vault Prolapses[tiab] OR Cystocele[tiab] OR Rectal Prolapse[tiab] OR Uterine Prolapse[tiab] OR Visceral Prolapse[tiab]

2- "Quality of Life"[mh] OR Quality of Life [tiab]

3- Surgery[tiab] OR Pessaries[tiab] OR pessary[tiab]

4- ("Pelvic Organ Prolapse"[mh] OR Pelvic Organ Prolapse[tiab] OR Pelvic Organ Prolapses[tiab] OR Urogenital Prolapse[tiab] OR Urogenital Prolapses[tiab] OR Vaginal Vault Prolapse[tiab] OR Vaginal Vault Prolapses[tiab] OR Cystocele[tiab] OR Rectal Prolapse[tiab] OR Uterine Prolapse[tiab] OR Visceral Prolapse[tiab]) AND ("Quality of Life"[mh] OR Quality of Life [tiab]) AND (Surgery[tiab] OR Pessaries[tiab] OR pessary[tiab])

#### Scopus

1- "Pelvic Organ Prolapse" OR "Pelvic Organ Prolapses" OR "Urogenital Prolapse" OR "Urogenital Prolapses" OR "Vaginal Vault Prolapse" OR "Vaginal Vault Prolapses" OR "Cystocele" OR "Rectal Prolapse" OR "Uterine Prolapse" OR "Visceral Prolapse"

2- "Quality of life"

3- "Surgery" OR "Pessaries" OR "pessary"

( TITLE-ABS-KEY ( "Pelvic Organ Prolapse" OR "Pelvic Organ Prolapses" OR "Urogenital Prolapse" OR "Urogenital Prolapses" OR "Vaginal Vault Prolapse" OR "Vaginal Vault Prolapses" OR "Cystocele" OR "Rectal Prolapse" OR "Uterine Prolapse" OR "Visceral

Prolapse" ) ) AND ( TITLE-ABS-KEY ( " Quality of life" ) ) AND ( TITLE-ABS-KEY ( " Surgery"  
OR " Pessaries" OR " pessary" ) )

## Web of Science

1- "Pelvic Organ Prolapse" OR " Pelvic Organ Prolapses " OR " Urogenital Prolapse" OR "  
Urogenital Prolapses" OR " Vaginal Vault Prolapse" OR " Vaginal Vault Prolapses" OR "  
Cystocele" OR " Rectal Prolapse" OR " Uterine Prolapse" OR " Visceral Prolapse"

2- " Quality of life"

3- " Surgery" OR " Pessaries" OR " pessary"

TS=("Pelvic Organ Prolapse" OR " Pelvic Organ Prolapses " OR " Urogenital Prolapse" OR "  
Urogenital Prolapses" OR " Vaginal Vault Prolapse" OR " Vaginal Vault Prolapses" OR "  
Cystocele" OR " Rectal Prolapse" OR " Uterine Prolapse" OR " Visceral Prolapse" ) AND TS=(" Quality of life" ) AND TS=(" Surgery" OR " Pessaries" OR " pessary")
